# Supplementary material
Source: publisher figshare collection journal article supplement (https://acs.figshare.com/ndownloader/files/4276146)
Supplement: Supplementary file 1 [file 4276146]

 
data_shelxl 
 
_audit_creation_method            SHELXL-97 
_chemical_name_systematic 
; 
 ? 
; 
_chemical_name_common             ? 
_chemical_melting_point           ? 
_chemical_formula_moiety          ? 
_chemical_formula_sum 
 'C15 H26 O2' 
_chemical_formula_weight          238.36 
 
loop_ 
 _atom_type_symbol 
 _atom_type_description 
 _atom_type_scat_dispersion_real 
 _atom_type_scat_dispersion_imag 
 _atom_type_scat_source 
 'C'  'C'   0.0033   0.0016 
 'International Tables Vol C Tables 4.2.6.8 and 6.1.1.4' 
 'H'  'H'   0.0000   0.0000 
 'International Tables Vol C Tables 4.2.6.8 and 6.1.1.4' 
 'O'  'O'   0.0106   0.0060 
 'International Tables Vol C Tables 4.2.6.8 and 6.1.1.4' 
 
_symmetry_cell_setting            monoclinic
_symmetry_space_group_name_H-M    'P 21/n'
 
loop_ 
 _symmetry_equiv_pos_as_xyz 
 'x, y, z' 
 '-x+1/2, y+1/2, -z+1/2' 
 '-x, -y, -z' 
 'x-1/2, -y-1/2, z-1/2' 
 
_cell_length_a                    16.377(3) 
_cell_length_b                    5.927(2) 
_cell_length_c                    29.072(7) 
_cell_angle_alpha                 90.00 
_cell_angle_beta                  87.537(17) 
_cell_angle_gamma                 90.00 
_cell_volume                      2819.5(13) 
_cell_formula_units_Z             8 
_cell_measurement_temperature     298(2) 
_cell_measurement_reflns_used     25
_cell_measurement_theta_min       10.0
_cell_measurement_theta_max       11.3
 
_exptl_crystal_description        prismatic
_exptl_crystal_colour             colorless
_exptl_crystal_size_max           0.90 
_exptl_crystal_size_mid           0.80 
_exptl_crystal_size_min           0.50 
_exptl_crystal_density_meas       ? 
_exptl_crystal_density_diffrn     1.123 
_exptl_crystal_density_method     'not measured' 
_exptl_crystal_F_000              1056 
_exptl_absorpt_coefficient_mu     0.072 
_exptl_absorpt_correction_type    psi-scan 
_exptl_absorpt_correction_T_min   0.9380 
_exptl_absorpt_correction_T_max   0.9649 
_exptl_absorpt_process_details    ? 
 
_exptl_special_details 
; 
 ? 
; 
 
_diffrn_ambient_temperature       298(2)
_diffrn_radiation_wavelength      0.71069
_diffrn_radiation_type            MoK\a
_diffrn_radiation_source          ?
_diffrn_radiation_monochromator   ?
_diffrn_measurement_device_type   'Rigaku AFC7R'
_diffrn_measurement_method        \w
_diffrn_detector_area_resol_mean  ?
_diffrn_standards_number          3
_diffrn_standards_interval_count  0
_diffrn_standards_interval_time   ?
_diffrn_standards_decay_%         0.00
_diffrn_reflns_number             4871
_diffrn_reflns_av_R_equivalents   0.0505 
_diffrn_reflns_av_sigmaI/netI     0.0414 
_diffrn_reflns_limit_h_min        -7 
_diffrn_reflns_limit_h_max        18 
_diffrn_reflns_limit_k_min        -6 
_diffrn_reflns_limit_k_max        2 
_diffrn_reflns_limit_l_min        -33 
_diffrn_reflns_limit_l_max        33 
_diffrn_reflns_theta_min          2.80 
_diffrn_reflns_theta_max          23.99 
_reflns_number_total              4415 
_reflns_number_gt                 2517 
_reflns_threshold_expression      >2sigma(I) 
 
_computing_data_collection        ? 
_computing_cell_refinement        ? 
_computing_data_reduction         ? 
_computing_structure_solution     'SHELXS-97 (Sheldrick, 1990)' 
_computing_structure_refinement   'SHELXL-97 (Sheldrick, 1997)' 
_computing_molecular_graphics     ? 
_computing_publication_material   ? 
 
_refine_special_details 
; 
 Refinement of F^2^ against ALL reflections.  The weighted R-factor wR and 
 goodness of fit S are based on F^2^, conventional R-factors R are based 
 on F, with F set to zero for negative F^2^. The threshold expression of 
 F^2^ > 2sigma(F^2^) is used only for calculating R-factors(gt) etc. and is 
 not relevant to the choice of reflections for refinement.  R-factors based 
 on F^2^ are statistically about twice as large as those based on F, and R- 
 factors based on ALL data will be even larger. 
; 
 
_refine_ls_structure_factor_coef  Fsqd  
_refine_ls_matrix_type            full 
_refine_ls_weighting_scheme       calc  
_refine_ls_weighting_details 
 'calc w=1/[\s^2^(Fo^2^)+(0.2000P)^2^+0.0000P] where P=(Fo^2^+2Fc^2^)/3' 
_atom_sites_solution_primary      direct 
_atom_sites_solution_secondary    difmap 
_atom_sites_solution_hydrogens    geom 
_refine_ls_hydrogen_treatment     constr
_refine_ls_extinction_method      none 
_refine_ls_extinction_coef        ? 
_refine_ls_number_reflns          4415 
_refine_ls_number_parameters      332 
_refine_ls_number_restraints      0 
_refine_ls_R_factor_all           0.1726 
_refine_ls_R_factor_gt            0.1146 
_refine_ls_wR_factor_ref          0.4324 
_refine_ls_wR_factor_gt           0.3713 
_refine_ls_goodness_of_fit_ref    1.627 
_refine_ls_restrained_S_all       1.627 
_refine_ls_shift/su_max           0.003 
_refine_ls_shift/su_mean          0.000 
 
loop_ 
 _atom_site_label 
 _atom_site_type_symbol 
 _atom_site_fract_x 
 _atom_site_fract_y 
 _atom_site_fract_z 
 _atom_site_U_iso_or_equiv 
 _atom_site_adp_type 
 _atom_site_occupancy 
 _atom_site_symmetry_multiplicity 
 _atom_site_calc_flag 
 _atom_site_refinement_flags 
 _atom_site_disorder_assembly 
 _atom_site_disorder_group 
O1 O 0.6800(3) 0.1685(10) 0.47589(14) 0.1062(17) Uani 1 1 d . . . 
H58 H 0.6509 0.1666 0.4536 0.159 Uiso 1 1 calc R . . 
O2 O 0.6666(4) 0.6458(19) 0.5113(3) 0.201(4) Uani 1 1 d . . . 
H59 H 0.6259 0.5700 0.5180 0.301 Uiso 1 1 calc R . . 
O3 O 0.5511(3) 0.1852(14) 0.4129(2) 0.149(3) Uani 1 1 d . A . 
H55 H 0.5213 0.2481 0.4323 0.224 Uiso 1 1 calc R . . 
C1 C 0.8090(3) 0.3075(9) 0.33640(17) 0.0672(14) Uani 1 1 d . . . 
C2 C 0.7957(3) 0.3062(10) 0.42700(16) 0.0609(13) Uani 1 1 d . . . 
H1 H 0.8088 0.1450 0.4258 0.073 Uiso 1 1 calc R . . 
C3 C 0.2914(3) 0.0066(12) 0.2977(2) 0.0833(18) Uani 1 1 d . . . 
H2 H 0.3042 -0.1531 0.2975 0.100 Uiso 1 1 calc R . . 
H3 H 0.2396 0.0244 0.2831 0.100 Uiso 1 1 calc R . . 
C4 C 0.9585(3) 0.3105(10) 0.36475(19) 0.0731(15) Uani 1 1 d . . . 
H4 H 0.9824 0.1709 0.3522 0.088 Uiso 1 1 calc R . . 
C5 C 0.9494(3) 0.3158(10) 0.41574(18) 0.0682(15) Uani 1 1 d . . . 
C6 C 1.0168(4) 0.4533(12) 0.3913(2) 0.0862(18) Uani 1 1 d . . . 
H5 H 1.0104 0.6159 0.3903 0.103 Uiso 1 1 calc R . . 
H6 H 1.0727 0.4009 0.3933 0.103 Uiso 1 1 calc R . . 
C7 C 0.8144(4) 0.0524(10) 0.3308(2) 0.0821(17) Uani 1 1 d . . . 
H7 H 0.8132 0.0143 0.2988 0.099 Uiso 1 1 calc R . . 
H8 H 0.7690 -0.0172 0.3472 0.099 Uiso 1 1 calc R . . 
H9 H 0.8645 -0.0006 0.3430 0.099 Uiso 1 1 calc R . . 
C8 C 0.4443(3) 0.1042(11) 0.2756(2) 0.0855(18) Uani 1 1 d . . . 
C9 C 0.8755(3) 0.4349(10) 0.43707(18) 0.0697(15) Uani 1 1 d . . . 
H10 H 0.8724 0.5855 0.4233 0.084 Uiso 1 1 calc R . . 
C10 C 0.8945(3) 0.4170(10) 0.33486(19) 0.0759(16) Uani 1 1 d . . . 
H11 H 0.9156 0.4152 0.3032 0.091 Uiso 1 1 calc R . . 
H12 H 0.8882 0.5738 0.3439 0.091 Uiso 1 1 calc R . . 
C11 C 0.4414(4) 0.0545(14) 0.3630(2) 0.094(2) Uani 1 1 d . A . 
H13 H 0.4452 0.2192 0.3607 0.113 Uiso 1 1 calc R . . 
C12 C 0.9789(4) 0.1040(12) 0.4402(2) 0.097(2) Uani 1 1 d . . . 
H14 H 0.9345 -0.0008 0.4441 0.116 Uiso 1 1 calc R . . 
H15 H 0.9984 0.1445 0.4697 0.116 Uiso 1 1 calc R . . 
H16 H 1.0224 0.0353 0.4219 0.116 Uiso 1 1 calc R . . 
C13 C 0.2799(3) 0.0839(10) 0.3485(2) 0.0777(16) Uani 1 1 d . . . 
C14 C 0.3550(4) 0.1247(13) 0.2691(2) 0.094(2) Uani 1 1 d . . . 
H17 H 0.3379 0.2708 0.2570 0.113 Uiso 1 1 calc R . . 
C15 C 0.7399(3) 0.3459(12) 0.4701(2) 0.0815(18) Uani 1 1 d . . . 
C16 C 0.7994(3) 0.3264(14) 0.5089(2) 0.092(2) Uani 1 1 d . . . 
H18 H 0.8140 0.1703 0.5142 0.110 Uiso 1 1 calc R . . 
H19 H 0.7762 0.3901 0.5373 0.110 Uiso 1 1 calc R . . 
C17 C 0.7620(4) 0.4026(12) 0.2960(2) 0.092(2) Uani 1 1 d . . . 
H20 H 0.7998 0.4393 0.2710 0.110 Uiso 1 1 calc R . . 
H21 H 0.7330 0.5361 0.3058 0.110 Uiso 1 1 calc R . . 
H22 H 0.7238 0.2918 0.2860 0.110 Uiso 1 1 calc R . . 
C18 C 0.4692(4) -0.0437(12) 0.3171(2) 0.0881(19) Uani 1 1 d . A . 
H23 H 0.4444 -0.1932 0.3141 0.106 Uiso 1 1 calc R . . 
C19 C 0.3541(5) -0.0054(12) 0.3782(2) 0.099(2) Uani 1 1 d . . . 
H24 H 0.3448 0.0494 0.4094 0.118 Uiso 1 1 calc R . . 
H25 H 0.3503 -0.1687 0.3795 0.118 Uiso 1 1 calc R . . 
C20 C 0.2756(4) 0.3402(11) 0.3513(3) 0.095(2) Uani 1 1 d . . . 
H26 H 0.3295 0.4002 0.3542 0.115 Uiso 1 1 calc R . . 
H27 H 0.2417 0.3834 0.3776 0.115 Uiso 1 1 calc R . . 
H28 H 0.2527 0.3985 0.3238 0.115 Uiso 1 1 calc R . . 
C21 C 0.5115(4) -0.0313(17) 0.3981(2) 0.108(3) Uani 1 1 d . . . 
C22 C 0.8733(4) 0.4625(14) 0.4910(2) 0.097(2) Uani 1 1 d . . . 
H29 H 0.9231 0.4044 0.5035 0.117 Uiso 1 1 calc R . . 
H30 H 0.8674 0.6200 0.4995 0.117 Uiso 1 1 calc R . . 
C24 C 0.4113(5) -0.0139(17) 0.2357(2) 0.114(3) Uani 1 1 d . . . 
H31 H 0.4073 -0.1771 0.2370 0.137 Uiso 1 1 calc R . . 
H32 H 0.4237 0.0479 0.2053 0.137 Uiso 1 1 calc R . . 
C25 C 0.5619(4) -0.0732(15) 0.3201(2) 0.101(2) Uani 1 1 d . . . 
H33 H 0.5831 -0.1844 0.2982 0.122 Uiso 1 1 calc R A . 
H34 H 0.5906 0.0684 0.3151 0.122 Uiso 1 1 calc R . . 
C26 C 0.5679(4) -0.1512(15) 0.3673(2) 0.107(2) Uani 1 1 d . A . 
H35 H 0.5560 -0.3114 0.3687 0.129 Uiso 1 1 calc R . . 
H36 H 0.6232 -0.1287 0.3770 0.129 Uiso 1 1 calc R . . 
C28 C 0.1994(5) -0.0103(14) 0.3678(3) 0.121(3) Uani 1 1 d . . . 
H39 H 0.1562 0.0940 0.3620 0.145 Uiso 1 1 calc R . . 
H40 H 0.2025 -0.0327 0.4004 0.145 Uiso 1 1 calc R . . 
H41 H 0.1885 -0.1519 0.3532 0.145 Uiso 1 1 calc R . . 
C29 C 0.6997(5) 0.5775(15) 0.4684(3) 0.126(3) Uani 1 1 d . . . 
H42 H 0.7400 0.6874 0.4576 0.151 Uiso 1 1 calc R . . 
H43 H 0.6567 0.5737 0.4465 0.151 Uiso 1 1 calc R . . 
C30 C 0.4921(5) 0.3146(15) 0.2667(3) 0.126(3) Uani 1 1 d . . . 
H44 H 0.5111 0.3186 0.2350 0.152 Uiso 1 1 calc R . . 
H45 H 0.5380 0.3179 0.2861 0.152 Uiso 1 1 calc R . . 
H46 H 0.4579 0.4432 0.2732 0.152 Uiso 1 1 calc R . . 
C35 C 0.7595(3) 0.3702(10) 0.38086(17) 0.0705(15) Uani 1 1 d . . . 
H47 H 0.7509 0.5322 0.3808 0.085 Uiso 1 1 calc R . . 
H48 H 0.7062 0.2998 0.3796 0.085 Uiso 1 1 calc R . . 
O4 O 0.4459(5) -0.4030(15) 0.4275(3) 0.134(4) Uani 0.693(12) 1 d P A 1 
H56 H 0.3960 -0.3959 0.4263 0.201 Uiso 0.693(12) 1 calc PR A 1 
C36 C 0.4824(6) -0.152(3) 0.4409(3) 0.122(6) Uani 0.693(12) 1 d P A 1 
H51 H 0.4400 -0.0640 0.4568 0.146 Uiso 0.693(12) 1 calc PR A 1 
H52 H 0.5273 -0.1696 0.4613 0.146 Uiso 0.693(12) 1 calc PR A 1 
O5 O 0.4374(9) 0.021(3) 0.4673(4) 0.093(6) Uani 0.307(12) 1 d P A 2 
H57 H 0.4525 0.1512 0.4628 0.140 Uiso 0.307(12) 1 calc PR A 2 
C37 C 0.4532(17) -0.117(4) 0.4236(13) 0.100(9) Uani 0.307(12) 1 d P A 2 
H53 H 0.4673 -0.2702 0.4318 0.120 Uiso 0.307(12) 1 calc PR A 2 
H54 H 0.4038 -0.1222 0.4064 0.120 Uiso 0.307(12) 1 calc PR A 2 
 
loop_ 
 _atom_site_aniso_label 
 _atom_site_aniso_U_11 
 _atom_site_aniso_U_22 
 _atom_site_aniso_U_33 
 _atom_site_aniso_U_23 
 _atom_site_aniso_U_13 
 _atom_site_aniso_U_12 
O1 0.068(2) 0.179(5) 0.071(3) -0.021(3) -0.0004(19) -0.018(3) 
O2 0.124(4) 0.323(11) 0.159(6) -0.149(7) -0.033(4) 0.088(6) 
O3 0.088(3) 0.245(8) 0.116(4) -0.062(5) -0.032(3) 0.024(4) 
C1 0.078(3) 0.067(3) 0.058(3) -0.004(3) -0.017(3) 0.002(3) 
C2 0.058(3) 0.074(3) 0.051(3) -0.008(2) -0.007(2) 0.012(3) 
C3 0.062(3) 0.106(5) 0.084(4) -0.026(4) -0.032(3) 0.006(3) 
C4 0.068(3) 0.078(4) 0.074(3) -0.001(3) -0.005(3) 0.002(3) 
C5 0.062(3) 0.074(4) 0.069(3) 0.004(3) -0.017(3) -0.002(3) 
C6 0.076(4) 0.094(5) 0.089(4) 0.002(3) -0.015(3) -0.006(3) 
C7 0.100(4) 0.071(4) 0.075(4) -0.011(3) -0.005(3) -0.002(3) 
C8 0.064(3) 0.078(4) 0.114(5) 0.008(4) -0.007(3) 0.012(3) 
C9 0.065(3) 0.080(4) 0.065(3) -0.008(3) -0.021(2) 0.005(3) 
C10 0.086(4) 0.079(4) 0.063(3) 0.006(3) -0.016(3) -0.008(3) 
C11 0.063(3) 0.139(6) 0.083(4) -0.009(4) -0.022(3) 0.023(4) 
C12 0.086(4) 0.108(5) 0.098(5) 0.022(4) -0.021(3) 0.015(4) 
C13 0.071(3) 0.075(4) 0.087(4) -0.012(3) -0.008(3) 0.008(3) 
C14 0.080(4) 0.112(5) 0.092(4) 0.019(4) -0.017(3) 0.022(4) 
C15 0.057(3) 0.120(5) 0.068(3) -0.025(3) -0.009(3) 0.010(3) 
C16 0.064(3) 0.148(6) 0.063(3) -0.026(4) -0.010(3) 0.013(4) 
C17 0.113(5) 0.100(5) 0.064(3) -0.006(3) -0.031(3) 0.001(4) 
C18 0.075(4) 0.096(5) 0.096(4) -0.018(4) -0.033(3) 0.019(3) 
C19 0.146(6) 0.085(4) 0.067(4) -0.012(3) -0.018(4) 0.037(4) 
C20 0.097(5) 0.078(4) 0.114(5) -0.016(4) -0.038(4) 0.019(4) 
C21 0.074(4) 0.182(8) 0.067(4) -0.032(5) -0.002(3) -0.007(5) 
C22 0.087(4) 0.130(6) 0.076(4) -0.024(4) -0.024(3) -0.002(4) 
C24 0.116(6) 0.156(7) 0.071(4) 0.001(4) -0.013(4) 0.027(5) 
C25 0.079(4) 0.136(6) 0.091(5) -0.013(4) -0.017(3) 0.033(4) 
C26 0.090(4) 0.152(7) 0.080(4) -0.013(4) 0.000(4) 0.026(5) 
C28 0.109(6) 0.111(6) 0.141(7) -0.005(5) 0.017(5) 0.015(5) 
C29 0.106(5) 0.163(8) 0.111(6) -0.067(5) -0.037(4) 0.066(5) 
C30 0.111(6) 0.133(7) 0.135(7) 0.023(6) 0.009(5) 0.020(5) 
C35 0.069(3) 0.078(4) 0.066(3) -0.010(3) -0.021(3) 0.003(3) 
O4 0.108(6) 0.145(8) 0.147(7) -0.067(6) 0.022(5) -0.008(5) 
C36 0.056(6) 0.255(19) 0.055(6) 0.013(7) -0.010(4) 0.076(9) 
O5 0.100(11) 0.127(13) 0.052(8) 0.036(8) 0.011(6) 0.036(10) 
C37 0.078(18) 0.069(14) 0.16(3) 0.008(16) -0.026(19) 0.010(13) 
 
_geom_special_details 
; 
 All esds (except the esd in the dihedral angle between two l.s. planes) 
 are estimated using the full covariance matrix.  The cell esds are taken 
 into account individually in the estimation of esds in distances, angles 
 and torsion angles; correlations between esds in cell parameters are only 
 used when they are defined by crystal symmetry.  An approximate (isotropic) 
 treatment of cell esds is used for estimating esds involving l.s. planes. 
; 
 
loop_ 
 _geom_bond_atom_site_label_1 
 _geom_bond_atom_site_label_2 
 _geom_bond_distance 
 _geom_bond_site_symmetry_2 
 _geom_bond_publ_flag 
O1 C15 1.443(8) . ? 
O1 H58 0.8200 . ? 
O2 C29 1.399(9) . ? 
O2 H59 0.8200 . ? 
O3 C21 1.509(11) . ? 
O3 H55 0.8200 . ? 
C1 C7 1.523(8) . ? 
C1 C17 1.538(7) . ? 
C1 C35 1.541(7) . ? 
C1 C10 1.542(8) . ? 
C2 C15 1.537(7) . ? 
C2 C35 1.538(7) . ? 
C2 C9 1.552(7) . ? 
C2 H1 0.9800 . ? 
C3 C14 1.480(9) . ? 
C3 C13 1.549(8) . ? 
C3 H2 0.9700 . ? 
C3 H3 0.9700 . ? 
C4 C5 1.484(8) . ? 
C4 C6 1.513(8) . ? 
C4 C10 1.527(7) . ? 
C4 H4 0.9800 . ? 
C5 C9 1.511(8) . ? 
C5 C6 1.523(8) . ? 
C5 C12 1.531(8) . ? 
C6 H5 0.9700 . ? 
C6 H6 0.9700 . ? 
C7 H7 0.9600 . ? 
C7 H8 0.9600 . ? 
C7 H9 0.9600 . ? 
C8 C24 1.478(10) . ? 
C8 C14 1.489(8) . ? 
C8 C30 1.489(10) . ? 
C8 C18 1.559(9) . ? 
C9 C22 1.575(8) . ? 
C9 H10 0.9800 . ? 
C10 H11 0.9700 . ? 
C10 H12 0.9700 . ? 
C11 C18 1.510(8) . ? 
C11 C19 1.521(10) . ? 
C11 C21 1.648(9) . ? 
C11 H13 0.9800 . ? 
C12 H14 0.9600 . ? 
C12 H15 0.9600 . ? 
C12 H16 0.9600 . ? 
C13 C28 1.518(9) . ? 
C13 C20 1.523(9) . ? 
C13 C19 1.610(9) . ? 
C14 C24 1.548(10) . ? 
C14 H17 0.9800 . ? 
C15 C29 1.524(10) . ? 
C15 C16 1.526(8) . ? 
C16 C22 1.527(9) . ? 
C16 H18 0.9700 . ? 
C16 H19 0.9700 . ? 
C17 H20 0.9600 . ? 
C17 H21 0.9600 . ? 
C17 H22 0.9600 . ? 
C18 C25 1.534(8) . ? 
C18 H23 0.9800 . ? 
C19 H24 0.9700 . ? 
C19 H25 0.9700 . ? 
C20 H26 0.9600 . ? 
C20 H27 0.9600 . ? 
C20 H28 0.9600 . ? 
C21 C37 1.29(3) . ? 
C21 C26 1.445(10) . ? 
C21 C36 1.494(15) . ? 
C22 H29 0.9700 . ? 
C22 H30 0.9700 . ? 
C24 H31 0.9700 . ? 
C24 H32 0.9700 . ? 
C25 C26 1.453(9) . ? 
C25 H33 0.9700 . ? 
C25 H34 0.9700 . ? 
C26 H35 0.9700 . ? 
C26 H36 0.9700 . ? 
C28 H39 0.9600 . ? 
C28 H40 0.9600 . ? 
C28 H41 0.9600 . ? 
C29 H42 0.9700 . ? 
C29 H43 0.9700 . ? 
C30 H44 0.9600 . ? 
C30 H45 0.9600 . ? 
C30 H46 0.9600 . ? 
C35 H47 0.9700 . ? 
C35 H48 0.9700 . ? 
O4 C36 1.657(18) . ? 
O4 H56 0.8200 . ? 
C36 H51 0.9700 . ? 
C36 H52 0.9700 . ? 
O5 C37 1.52(3) . ? 
O5 H57 0.8200 . ? 
C37 H53 0.9700 . ? 
C37 H54 0.9700 . ? 
 
loop_ 
 _geom_angle_atom_site_label_1 
 _geom_angle_atom_site_label_2 
 _geom_angle_atom_site_label_3 
 _geom_angle 
 _geom_angle_site_symmetry_1 
 _geom_angle_site_symmetry_3 
 _geom_angle_publ_flag 
C15 O1 H58 109.5 . . ? 
C29 O2 H59 109.5 . . ? 
C21 O3 H55 109.5 . . ? 
C7 C1 C17 108.2(5) . . ? 
C7 C1 C35 110.8(5) . . ? 
C17 C1 C35 106.8(5) . . ? 
C7 C1 C10 111.5(5) . . ? 
C17 C1 C10 107.9(5) . . ? 
C35 C1 C10 111.5(4) . . ? 
C15 C2 C35 115.8(4) . . ? 
C15 C2 C9 104.3(4) . . ? 
C35 C2 C9 113.8(5) . . ? 
C15 C2 H1 107.5 . . ? 
C35 C2 H1 107.5 . . ? 
C9 C2 H1 107.5 . . ? 
C14 C3 C13 116.6(5) . . ? 
C14 C3 H2 108.1 . . ? 
C13 C3 H2 108.1 . . ? 
C14 C3 H3 108.1 . . ? 
C13 C3 H3 108.1 . . ? 
H2 C3 H3 107.3 . . ? 
C5 C4 C6 61.1(4) . . ? 
C5 C4 C10 121.2(5) . . ? 
C6 C4 C10 121.6(5) . . ? 
C5 C4 H4 114.3 . . ? 
C6 C4 H4 114.3 . . ? 
C10 C4 H4 114.3 . . ? 
C4 C5 C9 117.6(4) . . ? 
C4 C5 C6 60.4(4) . . ? 
C9 C5 C6 119.5(5) . . ? 
C4 C5 C12 115.2(5) . . ? 
C9 C5 C12 117.2(5) . . ? 
C6 C5 C12 114.7(5) . . ? 
C4 C6 C5 58.5(4) . . ? 
C4 C6 H5 117.9 . . ? 
C5 C6 H5 117.9 . . ? 
C4 C6 H6 117.9 . . ? 
C5 C6 H6 117.9 . . ? 
H5 C6 H6 115.1 . . ? 
C1 C7 H7 109.5 . . ? 
C1 C7 H8 109.5 . . ? 
H7 C7 H8 109.5 . . ? 
C1 C7 H9 109.5 . . ? 
H7 C7 H9 109.5 . . ? 
H8 C7 H9 109.5 . . ? 
C24 C8 C14 62.9(5) . . ? 
C24 C8 C30 117.8(7) . . ? 
C14 C8 C30 114.9(6) . . ? 
C24 C8 C18 117.3(6) . . ? 
C14 C8 C18 115.8(6) . . ? 
C30 C8 C18 116.9(6) . . ? 
C5 C9 C2 111.0(4) . . ? 
C5 C9 C22 116.1(4) . . ? 
C2 C9 C22 104.8(4) . . ? 
C5 C9 H10 108.2 . . ? 
C2 C9 H10 108.2 . . ? 
C22 C9 H10 108.2 . . ? 
C4 C10 C1 117.0(5) . . ? 
C4 C10 H11 108.0 . . ? 
C1 C10 H11 108.0 . . ? 
C4 C10 H12 108.0 . . ? 
C1 C10 H12 108.0 . . ? 
H11 C10 H12 107.3 . . ? 
C18 C11 C19 114.2(6) . . ? 
C18 C11 C21 103.7(5) . . ? 
C19 C11 C21 114.8(6) . . ? 
C18 C11 H13 107.9 . . ? 
C19 C11 H13 107.9 . . ? 
C21 C11 H13 107.9 . . ? 
C5 C12 H14 109.5 . . ? 
C5 C12 H15 109.5 . . ? 
H14 C12 H15 109.5 . . ? 
C5 C12 H16 109.5 . . ? 
H14 C12 H16 109.5 . . ? 
H15 C12 H16 109.5 . . ? 
C28 C13 C20 108.0(5) . . ? 
C28 C13 C3 108.2(6) . . ? 
C20 C13 C3 110.5(6) . . ? 
C28 C13 C19 110.1(6) . . ? 
C20 C13 C19 109.5(5) . . ? 
C3 C13 C19 110.6(5) . . ? 
C3 C14 C8 124.2(6) . . ? 
C3 C14 C24 119.2(7) . . ? 
C8 C14 C24 58.2(4) . . ? 
C3 C14 H17 114.5 . . ? 
C8 C14 H17 114.5 . . ? 
C24 C14 H17 114.5 . . ? 
O1 C15 C29 111.6(5) . . ? 
O1 C15 C16 108.1(6) . . ? 
C29 C15 C16 112.5(5) . . ? 
O1 C15 C2 111.2(5) . . ? 
C29 C15 C2 110.7(6) . . ? 
C16 C15 C2 102.4(4) . . ? 
C15 C16 C22 103.3(5) . . ? 
C15 C16 H18 111.1 . . ? 
C22 C16 H18 111.1 . . ? 
C15 C16 H19 111.1 . . ? 
C22 C16 H19 111.1 . . ? 
H18 C16 H19 109.1 . . ? 
C1 C17 H20 109.5 . . ? 
C1 C17 H21 109.5 . . ? 
H20 C17 H21 109.5 . . ? 
C1 C17 H22 109.5 . . ? 
H20 C17 H22 109.5 . . ? 
H21 C17 H22 109.5 . . ? 
C11 C18 C25 104.7(5) . . ? 
C11 C18 C8 112.9(5) . . ? 
C25 C18 C8 113.7(6) . . ? 
C11 C18 H23 108.5 . . ? 
C25 C18 H23 108.5 . . ? 
C8 C18 H23 108.5 . . ? 
C11 C19 C13 119.3(5) . . ? 
C11 C19 H24 107.5 . . ? 
C13 C19 H24 107.5 . . ? 
C11 C19 H25 107.5 . . ? 
C13 C19 H25 107.5 . . ? 
H24 C19 H25 107.0 . . ? 
C13 C20 H26 109.5 . . ? 
C13 C20 H27 109.5 . . ? 
H26 C20 H27 109.5 . . ? 
C13 C20 H28 109.5 . . ? 
H26 C20 H28 109.5 . . ? 
H27 C20 H28 109.5 . . ? 
C37 C21 C26 127.0(15) . . ? 
C37 C21 C36 29.6(13) . . ? 
C26 C21 C36 117.0(9) . . ? 
C37 C21 O3 119.2(14) . . ? 
C26 C21 O3 108.9(6) . . ? 
C36 C21 O3 107.2(8) . . ? 
C37 C21 C11 87.6(16) . . ? 
C26 C21 C11 102.2(5) . . ? 
C36 C21 C11 117.2(7) . . ? 
O3 C21 C11 103.5(7) . . ? 
C16 C22 C9 105.6(5) . . ? 
C16 C22 H29 110.6 . . ? 
C9 C22 H29 110.6 . . ? 
C16 C22 H30 110.6 . . ? 
C9 C22 H30 110.6 . . ? 
H29 C22 H30 108.8 . . ? 
C8 C24 C14 58.9(4) . . ? 
C8 C24 H31 117.9 . . ? 
C14 C24 H31 117.9 . . ? 
C8 C24 H32 117.9 . . ? 
C14 C24 H32 117.9 . . ? 
H31 C24 H32 115.0 . . ? 
C26 C25 C18 101.4(6) . . ? 
C26 C25 H33 111.5 . . ? 
C18 C25 H33 111.5 . . ? 
C26 C25 H34 111.5 . . ? 
C18 C25 H34 111.5 . . ? 
H33 C25 H34 109.3 . . ? 
C21 C26 C25 111.2(7) . . ? 
C21 C26 H35 109.4 . . ? 
C25 C26 H35 109.4 . . ? 
C21 C26 H36 109.4 . . ? 
C25 C26 H36 109.4 . . ? 
H35 C26 H36 108.0 . . ? 
C13 C28 H39 109.5 . . ? 
C13 C28 H40 109.5 . . ? 
H39 C28 H40 109.5 . . ? 
C13 C28 H41 109.5 . . ? 
H39 C28 H41 109.5 . . ? 
H40 C28 H41 109.5 . . ? 
O2 C29 C15 112.5(8) . . ? 
O2 C29 H42 109.1 . . ? 
C15 C29 H42 109.1 . . ? 
O2 C29 H43 109.1 . . ? 
C15 C29 H43 109.1 . . ? 
H42 C29 H43 107.8 . . ? 
C8 C30 H44 109.5 . . ? 
C8 C30 H45 109.5 . . ? 
H44 C30 H45 109.5 . . ? 
C8 C30 H46 109.5 . . ? 
H44 C30 H46 109.5 . . ? 
H45 C30 H46 109.5 . . ? 
C2 C35 C1 117.6(4) . . ? 
C2 C35 H47 107.9 . . ? 
C1 C35 H47 107.9 . . ? 
C2 C35 H48 107.9 . . ? 
C1 C35 H48 107.9 . . ? 
H47 C35 H48 107.2 . . ? 
C21 C36 O4 109.8(8) . . ? 
C21 C36 H51 109.7 . . ? 
O4 C36 H51 109.7 . . ? 
C21 C36 H52 109.7 . . ? 
O4 C36 H52 109.7 . . ? 
H51 C36 H52 108.2 . . ? 
C37 O5 H57 109.5 . . ? 
C21 C37 O5 111.4(19) . . ? 
C21 C37 H53 109.4 . . ? 
O5 C37 H53 109.3 . . ? 
C21 C37 H54 109.4 . . ? 
O5 C37 H54 109.4 . . ? 
H53 C37 H54 108.0 . . ? 
 
loop_ 
 _geom_torsion_atom_site_label_1 
 _geom_torsion_atom_site_label_2 
 _geom_torsion_atom_site_label_3 
 _geom_torsion_atom_site_label_4 
 _geom_torsion 
 _geom_torsion_site_symmetry_1 
 _geom_torsion_site_symmetry_2 
 _geom_torsion_site_symmetry_3 
 _geom_torsion_site_symmetry_4 
 _geom_torsion_publ_flag 
C6 C4 C5 C9 110.0(6) . . . . ? 
C10 C4 C5 C9 -1.4(8) . . . . ? 
C10 C4 C5 C6 -111.4(6) . . . . ? 
C6 C4 C5 C12 -105.3(6) . . . . ? 
C10 C4 C5 C12 143.3(5) . . . . ? 
C10 C4 C6 C5 110.8(6) . . . . ? 
C9 C5 C6 C4 -106.9(5) . . . . ? 
C12 C5 C6 C4 106.2(6) . . . . ? 
C4 C5 C9 C2 67.5(6) . . . . ? 
C6 C5 C9 C2 137.4(5) . . . . ? 
C12 C5 C9 C2 -76.5(6) . . . . ? 
C4 C5 C9 C22 -172.9(5) . . . . ? 
C6 C5 C9 C22 -103.0(6) . . . . ? 
C12 C5 C9 C22 43.1(7) . . . . ? 
C15 C2 C9 C5 146.6(5) . . . . ? 
C35 C2 C9 C5 -86.3(6) . . . . ? 
C15 C2 C9 C22 20.5(6) . . . . ? 
C35 C2 C9 C22 147.6(5) . . . . ? 
C5 C4 C10 C1 -66.2(7) . . . . ? 
C6 C4 C10 C1 -139.3(5) . . . . ? 
C7 C1 C10 C4 -48.0(6) . . . . ? 
C17 C1 C10 C4 -166.6(5) . . . . ? 
C35 C1 C10 C4 76.4(6) . . . . ? 
C14 C3 C13 C28 165.3(6) . . . . ? 
C14 C3 C13 C20 47.3(7) . . . . ? 
C14 C3 C13 C19 -74.1(7) . . . . ? 
C13 C3 C14 C8 68.7(9) . . . . ? 
C13 C3 C14 C24 138.2(6) . . . . ? 
C24 C8 C14 C3 105.8(9) . . . . ? 
C30 C8 C14 C3 -144.3(8) . . . . ? 
C18 C8 C14 C3 -3.1(10) . . . . ? 
C30 C8 C14 C24 109.9(8) . . . . ? 
C18 C8 C14 C24 -108.9(7) . . . . ? 
C35 C2 C15 O1 78.9(6) . . . . ? 
C9 C2 C15 O1 -155.3(5) . . . . ? 
C35 C2 C15 C29 -45.7(7) . . . . ? 
C9 C2 C15 C29 80.1(5) . . . . ? 
C35 C2 C15 C16 -165.9(5) . . . . ? 
C9 C2 C15 C16 -40.0(6) . . . . ? 
O1 C15 C16 C22 161.7(5) . . . . ? 
C29 C15 C16 C22 -74.7(7) . . . . ? 
C2 C15 C16 C22 44.2(7) . . . . ? 
C19 C11 C18 C25 -151.2(6) . . . . ? 
C21 C11 C18 C25 -25.5(8) . . . . ? 
C19 C11 C18 C8 84.7(8) . . . . ? 
C21 C11 C18 C8 -149.6(6) . . . . ? 
C24 C8 C18 C11 -136.4(6) . . . . ? 
C14 C8 C18 C11 -65.1(8) . . . . ? 
C30 C8 C18 C11 75.3(8) . . . . ? 
C24 C8 C18 C25 104.5(7) . . . . ? 
C14 C8 C18 C25 175.8(6) . . . . ? 
C30 C8 C18 C25 -43.8(8) . . . . ? 
C18 C11 C19 C13 -64.4(8) . . . . ? 
C21 C11 C19 C13 176.0(6) . . . . ? 
C28 C13 C19 C11 175.8(6) . . . . ? 
C20 C13 C19 C11 -65.6(7) . . . . ? 
C3 C13 C19 C11 56.3(8) . . . . ? 
C18 C11 C21 C37 -124.9(14) . . . . ? 
C19 C11 C21 C37 0.4(14) . . . . ? 
C18 C11 C21 C26 2.5(8) . . . . ? 
C19 C11 C21 C26 127.8(7) . . . . ? 
C18 C11 C21 C36 -126.7(9) . . . . ? 
C19 C11 C21 C36 -1.4(11) . . . . ? 
C18 C11 C21 O3 115.6(6) . . . . ? 
C19 C11 C21 O3 -119.1(6) . . . . ? 
C15 C16 C22 C9 -31.3(7) . . . . ? 
C5 C9 C22 C16 -116.4(6) . . . . ? 
C2 C9 C22 C16 6.5(7) . . . . ? 
C30 C8 C24 C14 -105.3(7) . . . . ? 
C18 C8 C24 C14 106.6(6) . . . . ? 
C3 C14 C24 C8 -114.3(6) . . . . ? 
C11 C18 C25 C26 39.4(8) . . . . ? 
C8 C18 C25 C26 163.1(6) . . . . ? 
C37 C21 C26 C25 120(2) . . . . ? 
C36 C21 C26 C25 153.0(8) . . . . ? 
O3 C21 C26 C25 -85.3(8) . . . . ? 
C11 C21 C26 C25 23.7(9) . . . . ? 
C18 C25 C26 C21 -40.2(9) . . . . ? 
O1 C15 C29 O2 71.7(7) . . . . ? 
C16 C15 C29 O2 -50.0(9) . . . . ? 
C2 C15 C29 O2 -163.9(6) . . . . ? 
C15 C2 C35 C1 -172.9(5) . . . . ? 
C9 C2 C35 C1 66.2(6) . . . . ? 
C7 C1 C35 C2 65.8(6) . . . . ? 
C17 C1 C35 C2 -176.6(5) . . . . ? 
C10 C1 C35 C2 -59.0(7) . . . . ? 
C37 C21 C36 O4 66(3) . . . . ? 
C26 C21 C36 O4 -52.2(10) . . . . ? 
O3 C21 C36 O4 -174.7(6) . . . . ? 
C11 C21 C36 O4 69.7(10) . . . . ? 
C26 C21 C37 O5 149.8(11) . . . . ? 
C36 C21 C37 O5 70(3) . . . . ? 
O3 C21 C37 O5 -3(3) . . . . ? 
C11 C21 C37 O5 -106.7(19) . . . . ? 
 
_diffrn_measured_fraction_theta_max    0.999 
_diffrn_reflns_theta_full              23.99 
_diffrn_measured_fraction_theta_full   0.999 
_refine_diff_density_max    0.939 
_refine_diff_density_min   -0.282 
_refine_diff_density_rms    0.071 
